# Supplementary material
Source: PubMed Central journal article supplement (PMC5930377)
Supplement: AEM.02739-17_zam010188517s1.pdf [file AEM.02739-17_zam010188517s1.pdf]

1 **Characterization of *Serratia proteamaculans* strain AGR96X encoding an anti-feeding**  
2 **prophage (tailocin) with activity against grass grub (*Costelytra giveni*) and manuka beetle**  
3 **(*Pyronota* spp.) larvae**

4 Mark RH Hurst<sup>1,2</sup>; Amy Beattie<sup>1</sup>; Sandra A Jones<sup>1</sup>, Aurelie Laugraud<sup>3</sup>, Chikako van Koten<sup>3</sup> and  
5 Lincoln Harper<sup>4</sup>

6 <sup>1</sup>Forage Science, AgResearch, Lincoln Research Centre, Private Bag 4749, Christchurch 8140,  
7 New Zealand

8 <sup>2</sup>Bio-Protection Research Centre, Lincoln, Christchurch, New Zealand

9 <sup>3</sup>Knowledge & Analytics, AgResearch, Lincoln Research Centre, Private Bag 4749, Christchurch  
10 8140, New Zealand

11 <sup>4</sup>Curtin University; Department of Environment and Agriculture; Centre for Crop and Disease  
12 Management; Kent St, Bentley, WA 6102 Australia

13

14

15 **Table S1 AGR96X genome assembly data**

| Assembly                                                     | A5/AGR96X_final.scaffolds.csv |
|--------------------------------------------------------------|-------------------------------|
| Number of scaffolds                                          | 19                            |
| Total size of scaffolds                                      | 5471622                       |
| Total scaffold length as percentage of known genome size     | 4.9                           |
| Longest scaffold                                             | 2436133                       |
| Shortest scaffold                                            | 366                           |
| Number of scaffolds > 500 nt                                 | 17                            |
| Percentage of scaffolds > 500 nt                             | 89.5                          |
| N50 scaffold length                                          | 861236                        |
| L50 scaffold count                                           | 2                             |
| N50 scaffold - NG50 scaffold length difference               | 861236                        |
| Percentage of assembly in scaffolded contigs                 | 0                             |
| Percentage of assembly in unscaffolded contigs               | 100                           |
| Average number of contigs per scaffold                       | 1                             |
| Average length of break (>25 Ns) between contigs in scaffold | 0.789474                      |
| Number of contigs                                            | 19                            |
| Number of contigs in scaffolds                               | 0                             |
| Number of contigs not in scaffolds                           | 19                            |
| Total size of contigs                                        | 5471622                       |
| Longest contig                                               | 2436133                       |
| Shortest contig                                              | 366                           |
| Number of contigs > 500 nt                                   | 17                            |
| N50 contig length                                            | 861236                        |
| L50 contig count                                             | 2                             |
| N50 contig - NG50 contig length difference                   | 861236                        |
| <b>Scaffold number   size</b>                                | <b>X coverage</b>             |
| scaffold1   size 2436133                                     | 676.0289                      |
| scaffold2   size 861236                                      | 693.3952                      |
| scaffold3   size 452547                                      | 680.6453                      |
| scaffold4   size 309239                                      | 711.3371                      |
| scaffold5   size 287972                                      | 693.3683                      |
| scaffold6   size 264846                                      | 697.1971                      |
| scaffold7   size 214164                                      | 687.5617                      |
| scaffold8   size 208714                                      | 689.7185                      |
| scaffold9   size 122773                                      | 677.5747                      |
| scaffold10   size 114992                                     | 382.5988                      |
| scaffold11   size 954207                                     | 707.2675                      |
| scaffold12   size 64368                                      | 723.2397                      |
| scaffold13   size 36883                                      | 680.0028                      |
| scaffold14   size 1620                                       | 479.8568                      |
| scaffold15   size 1562                                       | 311.815                       |
| scaffold19   size 366                                        | 32.92896                      |
| Genome size 5471622                                          | 677.9828                      |

17

18

19 Se : AAAGGCTCGGGTATGGGAAATAGCAAAATTTACAACAAACGTGAGTAGATGATTTGCTCCTTCGGCACCGCAAATTCCTCCAGGCTGAAGTCTGGTACCGCAGGAAAAGTATGTGTTTCGCAAGCG : 124  
 20 Sp : AAAGGCTCGGGTATGGGAAATAGCAAAAGTTACAACAAACGTGAGTAGATGATTTGCTCCTTCGGCACCGCAAATTCCTCCAGGCTGAAGTCTGGTACCGCAGGAAAAGTATGTGTTTCGCAAGCG : 124

22 Se : AGTTTGGTCCAGTTCAGGTGATATCGCCATGTTGTTGAGAAACCGGCACTAGCCATTGTCA--TGCTGGTGCCGCAACTTTGCATGTAGTG-AATATATATGATGCAGACGGCATTGATGTGA : 245  
 23 Sp : AGTTTGGTCCAGTTCAGGTGATATCGCCATGTTGTTGAGAAACCGGCACTAGCCATTGTCAATGTTGGTGCCGCAACTTTGCATGTAGTGGAATATATATGATGCCGACGGCATTGATGTAA : 248

25 Se : TCGGGGCTCTTAAAGACGGTTGAGGCAGCAATACTGCCGTGCGCGCTA-----CCTCGACTGCATTACAGGTGAATTATATAAATTATTATTAATTGATTTCTATTGATATTTGT : 354  
 26 Sp : TCGGGGCTCTTAAAGACGGTTGAGGCAGCAATACTGCCGTGCGCGCTATGTAGGGGTCGCTACCTTCGACTGCATTACAGGTGAATTATATAAATTTTATTTATTGATTTCTATTGATATTTGT : 372

28 Se : TTTTGTGGTGTAAATCTTACTTTTTAAGATTTATTGGTTTTAAATTTTAAATTTATTTTGTGGTGTCTTTTTACTATTATTTGGTCTGTGATGCTGCTGAATTAAGGGTGGTGAT : 478  
 29 Sp : TTTTGTGGTGTAAATCTTACTTTTTAAGATTTATTGGTTTTAAATTTTAAATTTATTTTGTGGTGTCTTTTTACTCTTATTTACTCTGTGATGCTGCTGAATTAAGGATGGTGAT : 496

31 Se : GATCTATTAACCTTACATTGTAACCTTAATGATATAAATTCTAGTTTTTATTTATTTCTGGTTTATTGTTTTGTTATTTTATTTTATTCGATTGTTGAGTGGTGTGATTGTTGATGTT : 602  
 32 Sp : GATCTATTAACCTGACATTTAAGCTTTAATGATATAACATTCATTTTTTATTTATTTTGGTTTATTGTTTTGTTATTTTATTTCTTTATCGATTGTTTAGTGTGTTGATTGTTGATGTT : 620

35 Se : CATGAATTATCCTGATCATGTTGCTTAAGAATATACATTCTCTTTGTTGAGTTTTTGGCGGAGCTTCGCCTTACACCAGTTTCTTATAGTTTAAATTATTGGTGAATCGTAATGAAAAAAAAAATG : 726  
 36 Sp : AATGAATTATCCTGATCATGTTGCTTAAGAATATACATTCTCTTTGTTGAGTTTTTGGCGGAGCTTCGCCTTACACCAGTTTCTTATAATTTAAATTATTGGTGAATCGTAATGAAAAAAAAAATG : 744

38 Se : GTATTTGATTAGATGTAATTACGGGAAAATTGACTTAGGGCAAAAAGCTTGGAGGCTATGGGTGTTGAGTGTCTGCCCCAAGATTAAGTCCGGCTGAGTTGAAGGTTTTATTTGACAATAAA : 850  
 39 Sp : GTATTTGATTAGATGTAATTACGGGAAAATTGACTTAGGGCAAAAAGCTTGGAGGCTATGGGTGTTGAGTGTCTGCCCCAAGATTAAGTCCGGCTGAGTTGAAGATTTTTATTTGACAATAAA : 868

41 Se : AAAAAATTTTCAAAGGATGGTGTATTTCCCTCCTTACCTTTTTGTGAGGTTTGACATTGATCACATTCCAATATCAAAAATTC AACATGCCATCGGTGTAAGGATTTGTCAGGTTTGGTG : 974  
 42 Sp : AAAAAATTTTCAAAGGATGGTGTATTTCCCTCCTTACCTTTTTGTGAGGTTTGACATTGATCACATTCCAATATCAAAAATTC AACATGCCATCGGTGTAAGGATTTGTCAGGTTTGGTG : 992

44 Se : GGGGGATAAATTCAATACCCGATATTGTTATCGGAAAAATAATGAAAAATGATTACTTGTGAGGATTTGATAAAGATGTAATTAATAAAGATGTGAAAAATAAGTCTTTCGGGTTGATAC : 1098  
 45 Sp : GGGGGATAAATTCAATACCCGATATTGTTATCGGAAAAATAATGAAAAATGATTACTTGTGAGGATTTGATAAAGATGTAATTAATAAAGATGTGAAAAATAAGTCTTTCGGGTTGATAC : 1116

47 Se : TTTATTGTC AATGATAGAGAGCGAGCTAGGGAAAA CAATCATTAGGAATAAGCTTG TATAAAA CGTTAATAATCCTTGAGTTAATGTGATTTAACAGATTGTAAAAAACACATTGCCATCCATT : 1222  
 48 Sp : TTTATTGTC AATGATAGAGAGCGAGCTAGGGAAAA AAATCATTGGGAATAATCTTATATAAAA GTTAATAATCCTTGAGTTAATGTGATTTAACATATTGTAAAAAACACATTGCCATCCATT : 1240

51 Se : TTTTGTTAATTCAGGGGTTTTAATTGCGTCAATTTTAATTGGCTATGGGGACATTGTGAACCATTATTCTGGCTTCTTGATATGACTATAGACTGGTTAAAATTATATATATCTTCGGTCTAT : 1346  
 52 Sp : TTTT---AATGCAGGGGTTTTAATTGCGTCAATTTTAATTGGCTATGGGGACATTGTGAACCATTATTCTGGCTTCTTGATATGACTATAGACTGGTTAAAATTATATATATCTTCGGTCTAT : 1361

54 Se : GCTGCTTAAAGTCACTGAGTGTCTGCATTGACGAGTTTGAAAGATAATAAAGAAATTAAGAGGTTGTTACTTCAATGCTCGCGTGTGGTATTCTTGCCCTGTCTTTTTCTGGCATGTTAG : 1470  
 55 Sp : GCTGCTTAAAGTCACTGAGTGTCTGCATTGACGAGTTTGAAAGATAATAAAGAAATTAAGAGGTTGTTACTTCAATGCTCGCGTGTGGTATTCTTGCCCTGTCTTTTTCTGGCATGTTAG : 1485

57 Se : AGCATTTTGGACTACCTCGAACAGTGCTGGCATCGTGGTGGTATTATTGGGCTACTTGGCGTGGATAGAATCCGATATATGGTTTCTTCTAAATCAACTCCAAGACAAAGAAAGAATGAAA : 1594  
 58 Sp : AGCATTTTGGACTACCTCGAACAGTGCTGGCATCGTGGTGGTATTATTGGGCTACTTGGCGTGGATAGAATACGATATATGGTTTCTTCTAAATCAACTCCAAGACAAAGAA----TGAAA : 1605

60 Se : AAAGTTGATGTTATCATCTAATGAATAGGATTAATAATTCATTTATTTAAATTTGTTTCCGGATGTGTTGATCTTAAAGCTTTACCTTCGGTACTGCTTAATCGTTTCGATAGTTTGGAA : 1718  
 61 Sp : AAAATTAATGTTATTATCTAATGAATAGGATTAATAATTCATTTATTTAAATTTGTTTCCGGATGTGTTGATCTTAAAGCTTTACCTTCGGTACTGCTTAATCGTTTCGATAGTTTGGAA : 1729

62

63 Se : ACTCAATTTCCCTTTTTTAGCTTTCTAACCTTGTACAGTAGCGGATTACAATCCCGGATTGCGGGGTATAGCGATAGGTTGTGTGTAAAAATACTGACTTTGACTTGTTTTTAATCTAAAACA : 1842  
64 Sp : ACTCAATTTCCCTTTTTGAAGCTTTCTAACCTTGTACAGTAGCGGATTACAATCCCGGATTGCGGGGTATAGCGAGAGGTTGTGTGTAAAAATACTGACTTTGACTTGTTTTTAATCTAAAACA : 1853  
65  
66 Se : CCTTTTTTCAGCTACATTGAGCCAATGCTGGCATCTGGAGCCATCGTTTTTT-GCCAGTTAGTGAAGTCTGTGAGACAACCGTTTTATGGTGTGCTCGCCCGCCTGAGCGCTGGCAAACGCAACC : 1965  
67 Sp : CCTTTTTTCAGCTACATTGAGCCAATGCTGGCATCTGGAGCCATCGTTTTTTGCCAGTTAGTGAAGTCTGTGAGACAACCGTTTTATGGTGTGCTCGCCCGCCTGAGCGCTGGCAAACGCAACC : 1977  
68  
69 Se : GATTGCCACACAAGATACATTGGTACGGATCTGTGCCAGGAAGCCTTTCATCAGCACCGCAAACCTGCCATTTGGGGTTCTCTCGAACCCTCATCTACCGCAGTTAGTAGACCTTCGGTAG : 2089  
70 Sp : GATTGCCACACAAGATACATTGGTACGGATCTGTGCCAGGAAGCCTTTCATCAGCACCGCAAACCTGCCATTTGGGGTTCTCTCGAACCCTCATCTACCGCAGTTAGTAGACCTTCGGTAG : 2101  
71 sea23  
72 Se : TAGCGTGCCGCAGTAACGCACCATCTAAAATGTCAGGCTGGGATATGGCTGACATAGCGCTGCAGTATGTCCTCTTGATGGATTTTTGACGTTTGTGCTGTTGTGCCCTGTGATCGTAATAC : 2213  
73 Sp : TAGCGTGCCGCAGTAACGCACCATCTAAAATGTCAGGCTGGGATATGGCTGAAAATAGCGCTGCAGATTTCTCTTGATGGATTTTTGACGTTTGTGCTGTTGTGCCCTGTGATCGTAATAC : 2225  
74  
75 Se : GGATGGACCATGGCGCTGCCGCGATAATGTCGTAGCTGCAAGACCGCGACAGACGGGCTCGGATAAAACAGGGAAACAGGTCGTGGAGTAGCGGCTGTTGTTGTTGACGAACGGCCAGAGGTA : 2337  
76 Sp : GGATGGACCATGGCGCCGCCGCGATAATGTCGTAGATGCGAGACCGCGACAGACGGGCTCGGATAAAACAGGGAAACAGGTCGTGGAGTAGCGGCTGTTGTTGTTGACGAACGGCCAGAGGTA : 2349  
77  
78 Se : GCGGTCATGGGTACGCAGTCTATCAGGCGTAGCCGTAGCGGCGTGCCTATGAAGCAGGTGCCGAGGTAATAATGCGCTCGTTGCGAGTTTGGTCCAGTCGTTGAGGGTATCGCCATGTTT : 2461  
79 Sp : GCGGTCATGGGTACGCAGTCTATCAGGCGTAGCCGTAGCGGCGTGCACCTATGAAGCAGGTGCCGAGGTAATAATGCGCTCGTTGCGAGTTTGGTCCAGTCGTTGAGGGTATCGCCATGTTT : 2473  
80 Product5  
81 Se : ATTGTCATGCTGGAACAGCAGCTTTGCTGGGGCGGGTAATATCCATGAGGCAAAGTCTAATGACAGGAGACAGGAAAAGGGCGTGGCGCGAGCCGGCTCACGTCATAGAGGGGT-TAATTTATG : 2584  
82 Sp : ATTGTCATGCTGGAACAGCTGCATTGCTGGGTCCGGTAATATCCATGAGGCAAAGTCTAATGACAGGAGACAGGAAAAGGGCGTGGCGCGACCCGGCTCACGTCATAGAGGGGCATAATTTATG : 2597  
83  
84 Se : CGCGGGGGTGTGGATGGCGCCACAGCAAGTGCGGTAGGATCATCAACTGGCGCTGGCGTACTTGCCTCCATCTGGTGTAGGTTCCGCTTGCTGACCAAACGTACGGCTAACGATGCTGCTGC : 2708  
85 Sp : CGCGGGGGTGTGGATGGCGCCACAGCAAGTGCGGTAGGATCATCAACTGGCGCTGGCGTACTTGCCTCCATCTGGTGTAGGTTCCGCT-GCTGACCAAACGTATGGCTAAAGATGCTGCTGC : 2720  
86  
87 Se : TTTACCCAGCGCATCAATCGAGATACATGGCCCAACGTTAGTGCATTTAGGCCGAGAAACACCGTGTGTTATCGATGTATATAATATGCATATTTAATAACCATGATCACTACCATTT : 2832  
88 Sp : TTTACCGCCAGCGCATCAATCGAGATACATGGCCCAACGTTAGTGCATTTAGGCCGAGAAACACCGTGTGTTATCGATGTATATAATATGCATATTTAATAACCATGATCACTATCATGC : 2844  
89  
90 Se : TAATTGAAAGCTTTTCCGATTGTTATGTTTTTTGATAGCCATAACTATGAATTGGATTGGTAACGATCGTTACTAACGATTCTATTTGTTCTGAATTGATCCTATAGTTAATTCAGACA : 2956  
91 Sp : TCATTGAAAGTTTTTCCGATCGTTATGTTTTTTGATAGATTTTAACTATGCATTAGACTGATAACGATCGTTACTAACGATTCTATTTGTTCTGAATTGATCCTATAGTTAATTCAGACA : 2968  
92  
93 Se : AACAAGAGAGCGAACCTGAAAGCAGTCGTTTAAGATTTTTGATGAAAAATTGATTAATAGTCGCTAGGCGTGTTTTTAATACTTCCTATTATGTCAAT----- : 3054  
94 Sp : AACAAGAGAGCGAACCTGAAAGCAGTCGTTTAAGATTTTTGATGAAAAATTGATTAATAGTCGCCAGGCGTATTTTTAATACGTCCTATTATGTCAATCATATCTATAATTAGATGAGTCTGTT : 3092  
95 enp1  
96 Se : -----TATCTCAATATTTCTTACTTTCTATTTTATTAATCGTGATGTTATATTTGGTTTTTTATTATGTTATCACTTCAATAGAGAAGAATGTTTCGAAGGGGTTATTTATAAATGCGA : 3167  
97 Sp : TTTATATCAATTATCTCAAGTTTTCTTACTTTTTATTTTCTTAATCGTGATGTTATATTTGGTTTTTTATTATGTTATCACTTCAATAGAGAAGAAATGATCGAAGGGGTTATTTATAAATGCGA : 3216  
98  
99 Se : ATAGCTATGTTGTGCGGAATCATCGTCGTAATTGCAGCTTTTTCTTGGTCAACCCGATATTATATCAACAGTCAATCATCTGGAAGGAAAAATCGAAGGAAGCAAACGCATCAGTCAGGAAAT : 3291  
100 Sp : ATAGCTATGTTGGCGGGATTATCGTCGTAATTGCAGCTTTTTCTTGGTCAACCCGATATTACTATAAACAGTCAATCATCTGGCAGGAAAAAGCGAAGGAAGCAAACGCATCAGTCAGGAAAT : 3340  
101  
102 Se : ATGAAAAATCAAATTGAATTGATACAAAGTCAGCATCGCAAACCTAGCTGAATTAGATGAAACACCACACGGAGAAACTGAATGAGGCTGAACAAGAGAATACGGTCTGCGCACTCAGCTTGCCCG : 3415  
103 Sp : ATGAAAAATCAAATTGAATTGATACAAAGTCAGCATCGCAAACCTAGCTGAATTAGATGAGCACCACACGGAGAAACTGAATGAGGCTGAACAAGAGAATACGGTCTGCGCACTCAGCTTGCCCG : 3464  
104  
105 Se : TGGCCATCGCAGGATGCTCGTCTCTGGACAAATATCCTGTCCAGACAGAACATCCCCCTCAACCCGAGCTTGGGCTATGACGGCCCTTCGAACCTCTCTGCAGATACTGGACAGCGTATTCTT : 3539  
106 Sp : TGGCCATCGCAGGATGCTCGTCTCTGGACAAATATCCTGTCCAGACAGAACATCCCCCTCAACCCGAGCTTGGGCTATGACGGCCCTTCGAACCTCTCTGCAGATACTGGACAGCGTATTCTT : 3588  
107  
108 Se : TCTATCCGGGAAGGCATCATCAGAGACCAACAAAACTGATGTATCTTCAGAGTTATATTCGGCAGTTCTGTCTTAAAGATTAAAAATATATATATTTTAAATATATGGTACGTGCTAATTATT : 3663  
109 Sp : TCTATCCGGGAAGGCATCATCAGAGACCAACAAAACTGATGTATCTTCAGAGTTATATTCGGCAGTTCTGTCTTAAAGATTAAAAATATATATATTTTAAATATATGGTACGTGCTAATTATT : 3712  
110  
111 Se : ACGAGCCGATTAACGTGAGTTTATAATATTAACATAAAATTGGAGTTCTAATGATTATTTTTTCGTTACCAAACCGCTTCCTGATAGTGACATGTTATTCTTGGTTGATTGTAGGAGGATTC : 3787

112 Sp : ACGAACCGATTAACGTGAGTTTATAATGTTAACTAAAATTGGAGTTCTAATGATGATTTTTCCGTTACCAAACCGCTTCCTGATAGTGACATCGTATTCTCTTGGTTGATTGTAGGAGGATTC : 3836  
 113 *hol1*  
 114 Se : TCCGCTTGAGGCGGTATCGTTAGATATTTAATGGAAAACAAAGAGTCTGGGGAGAAAATTTTCATGGCTTGAGGTTTTCAAGCAAGTCGTTACTTCCGGATTTTCGGGGCTTTTAGCGGGGATCT : 3911  
 115 Sp : TCCGCTTGAGGCGGTATCGTTAGATATTTAATGGAAAACAAAGAGTCTGGGGAGAAAATTTTCATGGCTTGAGGTTTTCAAGCAAGTCGTTACTTTCGGATTTACGGGGTTTTAGCGGGGATCT : 3960  
 116  
 117 Se : ATGGCTATGAACAAGGATACAGCGAGTTTATAACCATGGCCTTCTCCGGTTTGAGTTGGGCATTAGGTGGTCACCTATTGGACTTATTATGGAAGCGATTAACATAATTAATTAGAAAAAGAAAA : 4035  
 118 Sp : ATGGCTATGAACAAGGATACAGCGAGTTTATAACCATGGCCTTCTCCGGTTTGAGTTGGGCATTAGGTGGTCACCTATTGGACTTGTATGGAAGCGATTAACATAATTCATTAGAAAAAGAAAA : 4084  
 119  
 120 Se : TTATTCTAAAAACTAGCTGTGGCGACAAGTTGGCTAGCACTGCTAGTGTTCAGTGATATATATTTAAATTTAACCAGATAAAATAAAAAATGTAATTTATAATAAATTTGGTTGATAACTACAAAA : 4159  
 121 Sp : TCATTCTAAACACTAGCTGTGGCGACAAGTTGCCTAGCCCTGCTAGTGTTCGGTGATATATATTTAAATTTAACCAGACAAATAAAA-TGTAATTTATAATAAATTTGGTTGATAACTACAAAA : 4207  
 122  
 123 Se : ACATCATTTTATGGCACCTATATAGATGCGGATTTGTTTTTACAGGGTGTGAGTATGTCTTAGTATCTTTTGTATGCGTAATACCTTACAGATGTGGGCGCCTTTTCCTTTTTGGATTTAAATT : 4283  
 124 Sp : GCATTATTTTATGGAACCTATATAGATGCGAATTTGTTTTTACAGGGTGTGAGTAT-----TTTTTGTATGCGTAATACCTTACAGATGTGGGTCCTTTTCCTTTTTGGATTTAAATC : 4322  
 125  
 126 Se : GATCCGCTCAATAGTGAGTTTTTTAAAATATGGCGGGGATTAATTTCAAACGTCAAGATCCTTTTTTATGAAGTGATCCGGTTTTAGAGAGTAGATGTCGCGCTCGTTGTAATATTTTATATTCATG : 4407  
 127 Sp : GAGTCACTCAATAGTGAATTTTTAAAATAGGACGGGGATTAATTTAAAATATTAAGTTCCTTTTTTATGAAGTGATCCGGTTTTAGAGAGTGGCTGGCCGCTCGTTGTAATGTTTTATATTAATG : 4446  
 128  
 129 Se : ATTTCAAATCACATATCCTGTAAATACTTTCAATGTCAATTTTGTGATATTTTCATTTATCTTCTGTATTGAATGCATACAT-FTTCGAATATGGATGGATGCCTGTGGCGATATTTCAAGT : 4530  
 130 Sp : ATTTCAATCACATATCCGGTAAATACTTTGCAATGTCAATTTTGTGATATTTTCATTTATCTTCTGTATTGAATGCATACATGTTTAGAATATAGATGGATGCCTGTGGCGATATTTCAAGT : 4570  
 131 *mur1*  
 132 Se : ATGTAGTTTTATCTCTGCGATCAGCTGTCAGATAAACCTGTTGGTACGGAGGTTACAATGATAATCGATGTTAATGGACTTAAACTCATTAAACATTTTGAGGGGCTAAGGCTCCGTGCTTATC : 4654  
 133 Sp : ATGTAGTTTTATCTCTGCCATCAGCTGTCAGATAAACCTGTTGGTACGGAGGTTACAATGATAATAGATGTTAATGGACTTAAACTCATTAAACATTTTGAGGGGCTAAGGCTCCGTGCTTATC : 4694  
 134  
 135 Se : AATGCTCGGCCAACGTATGGTCCATTGGATATGGTCATACTGCCGGCGTCGGTCCGGATGATGTTATTACCGAAGGGCAGGCTATTTCTTCTTGGCTCAGGATGTAGCGGAGAGTGAACGGGC : 4778  
 136 Sp : AATGCTCGGCCAACGTATGGACCATTGGATATGGTCATACTGCCGGCGTCGGTCCGGATGATGTTATTACCGAAGAGCAGGCTATTTCTTCTTGGCTCAGGATGTAGCGGAGAGTGAACGGGC : 4818  
 137  
 138 Se : AGTAAATCAGTATGTGCATGTTCCGCTTACGCAAAATCAGTTTGATGCCCTGGTTTCATTTGTTTTCAACCTGGGCGTCGGGAATTTCCGAACCTCAACGCTGCTGAAAAAATCAATGCCGGT : 4902  
 139 Sp : AGTAAATCAGTATGTGCATGTTCCGCTTACGCAAAATCAGTTTGATGCCCTGGTTTCCTTTGTTTTCAACCTGGGCGTCGGGAATTTCCGAACCTCAACGCTGCTGAAAAAATCAATGCCGGT : 4942  
 140  
 141 Se : GATTATGACGGCGCGGCCAGGAATTTGGGCGTTGGATCCATGCCGGCGGTAAAGCGCTGCCCGGCTGGTACGCAGAAAGAGAGGCCGAAAGCGCACTCTTTCTGAAATAAGTAACACAGTTAG : 5026  
 142 Sp : GATTATGACGGCGCGGCCAGGAATTTGGGCGTTGGATCCATGCCGGCGGTAAAGCGCTGCCCGGCTGGTACGCAGGAGAGAGGCCGAAAGCGCACTCTTTCTGAAATAAGTAACACAGTTAG : 5066  
 143 *ops*  
 144 Se : ACGTATTTTTATTTATAAGCATGAAAAACAACCTGGTGTAATCAGGGGCGGTAGCATGCTTTTTTTTCAGGGGAAACGGAGTTAATTAATTTGTTTTTCATGCAGATAATTTAAAAGGATTAT : 5150  
 145 Sp : ACGTATTTTTATTTATAAGCATGAAAAACAACCTGGTGTAATCAGGGGCGGTAGCATGCTTTTTTTTCAGGGGAAACGGAGTTAATTAATTTGTTTTTCATGCAGATAATTTAAAAGGATTAT : 5190  
 146 *afp1*  
 147 Se : TTGCACCCACTATTGATTGTAAAAAGAAGGATTTAACTCATGGCTATTACCGCAGACGACATTGCAGTGCAATATCCAATCCCTACTTATCGCTTTATTGTGACCCTGGGCGATGAGCAGGTGC : 5274  
 148 Sp : TTGCACCCACTATTGATTGTAAAAAGAAGGATTTAACTCATGGCTATTACCGCAGACGACATTGCAGTGCAATATCCAATCCCTACTTATCGCTTTATTGTGACCCTGGGCGATGAGCAGGTGC : 5314  
 149  
 150

151 **Fig. S1** Nucleotide alignment of the region upstream of *S. entomophila* (Se) *afp1* and *S. proteamaculans* (Sp) AGR96X *afpX1*. The regulatory  
 152 loci *anfA1* and *anfA2* and the phage lysis cassette (*mur1*, *enp1*, and *hol1*) are labelled above their respective initiation codons. The *ops*-  
 153 associated element (bold underscore), located between *enp1* and *afpX1*, is indicated. Non-shaded regions denote nucleotide dissimilarity.  
 154 Italics denote the ORFs.

155

156

157

*afp17*

```

158 SeAfp17 : AATATTAATCAGTGGTGAGTTTGCATTTACACCCCGTCATTTATTTAAAAGAGGTATATTTATGCCGACTAAAAACACCACAGTTACAGCTGGCGATCGAAGAATTTAATAAAGCAATATTACGG :
159 SpAfp17 : AATATTAATCAGTGGTGAGTTTGCATTTACACCCCGTCATTTATTTAAAAGAGGTATATTTATGCCGACTAACACACCACAGTTACAGCAGGCGATTGAAGAATTTAATAAAGCAATATTACGG :
160
161 SeAfp17 : GCTGCAGAATATGAATGGAATATTGAAAATAATATTTACGATAAAAGTTCACACACTTTTCCCAGCAGCAGATAAAATCTCTAAAAGAGAGTGTGGTCCGCGCAGAGCGTTGAAAAAATATCTGAGG :
162 SpAfp17 : GCTGCAGAATATGAAGGGAATATTGAAAATAATATTTACGATAAAAGTTCACACACTTTTCCCAGCAGCAGATAAAATCTCTAAAAGAGAGTGTGGTCCGCGCAGAGCGTTGAAAAAATATCTGAGG :
163
164 SeAfp17 : AAAACCAGGCGTTTGAAGTTTAACTTGGGTAACGATCTCCTTGAATTTCCGGCAGTAGAATATATTGCTCGTTCTTTTTTACGCAGAATACTGGAAAACTGGCTATTTATCAAGCTAGAGA :
165 SpAfp17 : CAAACCAAGCGTTTGAAGTTTAACTTGGGTAACGACCTCCTTGAATTTCCGGCAGTAGAATATATTGCTCGTTCTTTTTTACGCAGAATACTGGAAAACTGGCTATTTATCAAGCTAGAGA :
166
167 SeAfp17 : TCCATCATTTACTATAACGAAAACCAATCAGGATGCCGGGATAGGTTTCTTGGAAAGGTTGGAAAGCGATAACCGGAAATGGGCAAAGCAAATGAACGCGCTGCTGAATGAAAGCAAGGTTAAC :
168 SpAfp17 : TCCATCATTTACTATAACGAAAACCAATCAGGATGCCGGGATAGGTTTCTTGGAAAGGTTGGAGCAGCGATAACCGGAAATGGGCAAACAAATGAACGCGCTGCTGAATGAAAGCAAGGTTAAC :
169
170 SeAfp17 : GCCCGCGTTTTGACCAGCCTGGCATAACAGCTATATCCGCTTTTTTCGCCCGCTGAAGACATTGCGCAAGCTGGGAGGGGAGGCTAATGAGTCTTTGCTGAACAGCAAAGAGCCAACCCGCGTC :
171 SpAfp17 : GCCCGCGTTTTGACCAGCCTGGCATAACAGCTATATCCGCTTTTTTCGCCCGCTGAAGACATTGCGCAAGCTGGGAGGGGAGGCTAATGAGTCTTTGCTGAACAGCAAAGAGCCAACCCGCGTC :
172
173 SeAfp17 : TGGATATTTTTGCCAGCTCAACGGCGGGAGCGCCGCCGGTCAATGTCGAAGCCGATCACCCTCAGCCTCACGGCTGGGTGTGGCTAAAATACGCCGACTGGAACGCCCGGGAAGCGTTGGGTAT :
174 SpAfp17 : TGGATATTTTTGCCATCTCAACGGCGGGATCGCCGCCGGTCAATGTCGAAGCCGATCACCCTCAGCCTCACGGCTTGCCGTGGCTAAAATACGCCGACTGGAACGCCCGGGAAGCGTTGGGTAA :
175
176 SeAfp17 : CAAAACGTCCACGGATTTAATTGGCAGCCGGCCAAGCAGCGACCAGCATAAAGGTACAGGCTTCAAGTTTAAAGGCATGCTGCAGGCGATAAAGCCGCCGCTGTATCGACGCCATTCAATTTCC :
177 SpAfp17 : CAAAACGTCCACGGATTTAATTGGCAGCCGGCCAAGCAGCGACCAGCATAAAGGTACAGGCTTCAAGTTTAAAGGCATGCTGCAGGCGATAAAGCCGCCGCTGTATCGACGCCATTCAATTTCC :
178
179 SeAfp17 : CTTAGGGAACGCGACGAACATGAATCGGGGTACGGCGGTTTCGTTATCAACGATAAGTCGATGACCTCAATAGGGGCAGAAAAACCGTTGGTGGTGAATTGGCGTCAGCAGAACATGGATAAAA :
180 SpAfp17 : CTTAGGGAACGCGACGAACATGAATCGGGGTACGGCGGTTTCGTTATCAACGATAAGTCGATGACCTCAATAGGGGCAGAAAAACCGTTGGTGGTGAATTGGCGTCAGCAGAACATGGATAAAA :
181
182 SeAfp17 : AGCTGCCGATGTTTTCCGGCCCGTCCAGCACCCTTCCCTATATGTATGAAATTGCCCGTTTGGCTGAATCTGCCTGCTGCTGAAAACACAGGTATCTACGTTTTCGATAATTCGGCTCTGTCAAGT :
183 SpAfp17 : AGCTGCCGATGTTTTCCGGCCCGTCCAGCACCCTTCCCTATATGTATGAAATTGCCCGTTTGGCTGAATCTGCCTGCTGCTGAAACACAGGATTCGGTTGCTTCTGTGGGCTGGATGATCCA :
184
185 SeAfp17 : ATTTAGGTCAGAGTGTAACTAATAGTTTTGTCACATTAGCGTAGGTCAGATAACAGCGAATACACTGAATATGCAGCCACA :
186 SpAfp17 : GGCGCGCATCACAGTTTTACCGAGATTATGGGGGCGCTGG-ATGCCTATGCCATGGAGTTTGACGAGCGGGGCCACGT :
187

```

188 **Fig. S2** Nucleotide alignment of *S. entomophila* (Se) *afp17* and *S. proteamaculans* (Sp) AGR96X *afpX17*. Non-shaded regions

189 denote nucleotide dissimilarity. Italics denote the ORF.

190

191

192

```

193
194
195 SeAfp16 : MSNYQTLVDVNNAMNKMLRAYVNEAVAIRFDLPDVDATQADAAISVFLYDIHEDLQLRTAESRGFNAGAGRLLPGWVNVKCNYLITYWESTGPATDADNP : 100
196 SpAfpX16a : MSNYQTLVDVNNAMNKMLRAYVNEAVAIRFDLPDVDAASDAAISVFLYDIHEDLQLRTAESRGFNAGAGRLSPGWVNVKCNYLITYWESTGPATDAGNP : 100
197 SpAfpX16b : MSNYQTLVDVNNAMNKMLRAYVNEAVAIRFDLPDVDATQADAAISVFLYD-----IITYWESTGPATDADNP : 66
198
199 SeAfp16 : DSQPDNQAIQVMSQVLAALINNRLADIPGAYTQVMPPKENLNLSLGNFWQSLGMRPRLSLNYCVTVPIISLSDKGEEMTPVKSLSTTVEPKAPLSPPLVITD : 200
200 SpAfpX16a : DSQPDNQATQVMSQVLAALINNRLADIPGAYTQVMPPKENLNLSLGNFWQSLGMRPRLSLNYCVTVPIISLSDKGEETVPVKSLSTTVEQKASVSPQVITD : 200
201 SpAfpX16b : GSQPDNQAIQVMSQVLAALINNRLADIPGAYTQVMPPKENLNLSLGNFWQSLGMRPRLSLNYCVTVPIISLSDKGEEMTPVKSLSTTVEPKAPVSPQAVISD : 166
202
203 SeAfp16 : ALREQLRVALGGDYDACLAMTHVNLDSSEPVANS DGSAAEIRVSLRVYGMTPTTEYLAPMNTVFNEWKSEAAAVTPDGYRVYINAVDKTDLTGI : 293
204 SpAfpX16a : ALRERLMVALGGGTDARLAVTHVNLDAEPVVASNGSAAEIRAAALRVSGITRAEYLAPMNAVFEEWAKDEAAAVTPDGYRITYITAVDNTDLTGI : 293
205 SpAfpX16b : VLREQLMVALGGDYDARLAMAHVNLDAEPVASSNGSAAEIRVSLRVYGMTRTEYLGPMNTVFEEWAKDEAAAVTPDGYRVYINAVDKTDLTGI : 259
206

```

207 **Fig. S3** Amino acid alignments of *S. proteamaculans* (Sp) AGR96X, AfpX16a, and AfpX16b against the *S. entomophila* (Se) Afp16 amino  
208 acid sequence.

209

210

211

212 YrAfp18 : MPYFNKSKK-NEIREKSKK-EVGGVLFDDSAIHENIDHNME-P-OTGDVATFPDNS-DEVVGGDLAALRARLQATIGL-YLPEFYEFQOTGRNILYPKFVDIKALQARLNSM----- : 108  
213 SpAfpX18 : MPYASELKKLKD-KP--TENE--NFL-TNS--EN-E-T-ELPARI-PS-SFFTE-SLDBEIEADLAELELRAHLOATISD-ALGCFYEFQOAGYNLLYPKFVDIEALQARVNTMQI----- : 99  
214 SeAfp18 : MPYSESSEK-----K-E-----T-SKETERDN---ADPVFQRVQGGVGVSPDPGGDLSAGSNNNDLFAFIRETHLEAQEFLRKGYNQVPEVDEGLLTQLRDDLAAAKSRQY : 101  
215  
216 YrAfp18 : -----PITAWIQEQLQQQ-LEQAGNAFLDRFRLPRKEKDWNNNALEFVKFRLAVKETEWDQOQTRDYNEALKHANRLSGYLSGTLDLIQHL-NDNPEROTSWEAVRKTSDMLLNLLELP : 219  
217 SpAfpX18 : -----PVL--IQP-QHKLLEQANAFDRFRFRKESDLHNNNALEFIKFRLEVNKAGWDEPQNRDYHQALKHANRLSGYLSGTLDLMS-LINENVEROTPEWETTRQANYDVLLNLLELP : 208  
218 SeAfp18 : VQASVGGPLGSRWLEQIGKIERLTDKFSDEVIKRWVKHELP-----RKNVGEAAGTELGSR--RRAQSLARRLESTMQTLIRVVHTLHAMDDYSTP---E--KRHDMLVAELETG : 204  
219  
220 YrAfp18 : VDAE-NNGNOYTAIRGNLT-----KNHPDNKFNITVNSVTRDERMASEALSAE TKGLSARLLSG-----TALTRNSAEKIDDKSETSG : 298  
221 SpAfp18X : VNADAHN-NOYAAKTRGNLTG-----K-QPDNIKFNATVYSVTLDERIAREALSAEIERLSARLLSG-----ITLTRNYAEKPDDETGETSG : 287  
222 SeAfp18 : AFSSSDKNTVIQALGRMTAETS GHAAWASLMQARTAAWEAGKSAITVDAMTATSQHEAEKANKKARELQDSQAFVSHVAAYLQSLSSDLAKVSNMGQSTSSSTIRNEAEKASLELQ---- : 320  
223  
224 YrAfp18 : ITRDIVALCOVQLQVWIKTKRRRGEYIQLTIDWQPSSEHKLPQOKEELTKAETVKRELKVKSR-KVMMQKVOGAKTILG-VLSDKTNKNRHRITQTLFYS-ANPDNTVSRKTNEAVFRAGIM : 415  
225 SpAfpX18 : IKRDIIDFLCOVQLQSVIHDVYPYAGQIQPPEY-YQP----L-GQKEAHTETETVKHEL-KNIWKTAROKVOGAKAS-GQALSDKFNKNKHRIVHAFEGSTAS-DKNGDSHNINKAVFOVGIR : 398  
226 SeAfp18 : --GDS-----Q--TFVSHVAAYLQSPSLDLAKVPINMWNQNMDFVKTKLQAQTAVAGMKVHAHRLVRIAQHG---HSTKTPAK---DPEQ-----VVTDSTIRSLWLWQOQPAIK : 414  
227  
228 YrAfp18 : LLDKIQQOTTSGIHKASL-ASRPLQHAVTQYSAL-EQMSGMPNSRILDALKRSRSGRWQEKAEKSKKQ-----LQHTIREITALAE--EHLKHKFMSALRDELKRA--PETLASNNII : 522  
229 SpAfpX18 : LLDKIQQOTTS DMHKA-IQTSRPLQOAVTQYSELGE-MLSGMPHNSILDALKRAESDRWQKAEBSKEQ-----LQQLLGTITLSD--ESMKORYLSALREELNSVTNP--LASNNII : 505  
230 SeAfp18 : IQCASTALLSKVGLKKEGILASAVTDELGN-EQERRNPFGEEDLDAQLR-EWVSASLQENPENQRAVKVVTLERLLGGDTSARNLVERLQKAEECTQNLRRRQQVAVLKMVSVERL : 532  
231  
232 YrAfp18 : SNFDTRAKIVVEGLASIEIGMNSQSVRLLAGHGEAGRK-----DLDEQVVAWLORLERIKGELKTDITQATGQSINNFSROGMLARRMGEWNEAEKORYLAALSTEDRAVAEMQYNTLFF : 636  
233 SpAfpX18 : RDFDQIKATVVEGLSDIQKALCOALLRLESEHQAGGK-----ELDKHTVSWLQOLKGIKDNLKTGITQATGQSINNFSREGMLARWMAEWSEAEKORYLGTLSAEGRAVTEKHVDYTVFF : 619  
234 SeAfp18 : PAAVSSLKAVDKLPLDLAGDLTASIAALSNAQAEYPARDFSBAKIQAGYAQLWATKVKESLSAASARLTERPLDEHSRG--ARLAKHWANLAKERSVGNYPDPD-----AQQVLAS : 643  
235  
236 YrAfp18 : EVIQHYLPLLSKETDPOGEERLQRLRLEVSNAAECTTVYPATMAEILAGMKSTEQAIRDWSGR-----KLLRVVFLAACLEGVKLMPKLALPLRVAIKFVITGAKVAWATHKG : 745  
237 SpAfpX18 : EVIQHYLPLLSKESDPOGEGLLQRLRLEVGNAAKNTLYPATMADILAGMKSREQAIRDWSER-----KLIRGAFLAVCLGGVKLLPLAALPLRPLKFAITGAKVAWGAHKG : 728  
238 SeAfp18 : LKEQGLLAGLTLSTGDPACYLFATRLAGELBNAGNCELRIEMSPQYVALEKGLVEYIVKMGQRISQGVTRIVIELSFEQALDTSFNVSKLFRLEPYKVLKASLIKIPYVNVKVNNTYMPG : 763  
239  
240 YrAfp18 : QQGIRGEGGDVDDIEIGEYAKRSFKTASVKVVLSPPLGLATMLGVASTALDVY-----EGGLKGCAGKIAKNIVGDAPWRAL : 821  
241 SpAfpX18 : QQGIRGEGGDIDIEIAYFKQSYKTAAIKIVLSLPPGLATTLGIASIVMDVY-----EDGLKGCAGKVAKHIIGPAPWRGL : 804  
242 SeAfp18 : HDKPKYAIYGLLGGKLLKQLGNLITAPVPGVMKIVAGTGTIAGAGVHNRVENREKTFSAVYQHVVEGKQSEKIKMDSVKSMIFDSVLDTATTAAFKGGRRAWQSGRNKNDIEINEVTLS : 883  
243  
244 YrAfp18 : NQSKIAAEAY-TTASMNAALEKGGANPVSHSSTLQOQMDAKPFDNSDQDADQP-RVRKRKEMTDEIMLSDGSSRSEAKALPDENELDTQSKSRPESALAVETLQSEHFDFFDRGIRYQ : 939  
245 SpAfpX18 : DTGTRTVAEAYATTL-IEFAITEKIKITSAFHSSPLQPTDVMPLSDEHDPGINQPHRIR-KRAVADT-ARF-APR---RS-P---QWH-D-N-I-P-SD-A--TLQSGHFDFFDRDIRYQ : 905  
246 SeAfp18 : QAQRQVAANNVDTAWGNAAANERKVEPVSHSSPLOQQTQDVRPFSKSDQDAAQE-RVR-KRAVADMAPP---HQQWHNN-----IPANTLQSEHFDFFDRDIRYQ : 980  
247  
248 YrAfp18 : DFSDEQKKQTYLHGIKFVLLQIENDGHFAQNIRNNAYLARIGAKLAVPVDIYR-YKLNNT-FLLPDEIDSKSGVLRIRDSEIPYVVYSEKDLLENIAWAMPYNAAN-RGPKLF-S-LD- : 1053  
249 SpAfpX18 : DFSDEQKKQTYLHGIQEVLQIENDGRFSQOIRNNAYLARIGDKLLVPVDI-KGHKLNNTIFL-PDSRGAKSGVLRILDSIPYVVYVDEKDLLENVWAMPYNAAN-RKREP-RIVTRRLTR : 1021  
250 SeAfp18 : GFSDEKKKQTYLHGILQVLLQIQNDGRFAQKIRNNAYLASIGVSNLVPVDIEG-YKLNNT-FLLPDSPAKSGVLRILDSENPYVVYVGSDDLLEDIKWAMPYNAAN-RKREP-RIVTRRLTR : 1094  
251  
252 YrAfp18 : PGEVTS--SH-SGVDILNIRSEREFK-EITYFNYPAPAMSIESLSAQLANTEADYKFKNTSPTNKILISRAIVGAHI--PDGVRATQGE-YHIEFDS-DELAAPAKYLRSFARPFSTL : 1165  
253 SpAfpX18 : VGRMRGFISSPFGVDILNIRSGKARFGEN-FNANNPDPMDIASLSARLADTMEADYKLGQSITPNKLLISRAIVGAHISAPDSITFTTE-EKYHLEF-TWDNLTPAEYLRSFARPFSTL : 1138  
254 SeAfp18 : -DGNAHFYRLRNGFDIFNDIRMGNSSE-EYEFNYNPEPISITLSSYLANTEGCDYKNGSSPPEKLNKLLISRAIVGAHIP--DPGVTAAG-YHIEF-TWDNLTSAEYLRSFARPFSTL : 1208  
255  
256 YrAfp18 : SGEMQLISSSIKGETIQETELHVHQAEYIGSWVDATAGAIISFTPEGWELNTAQSAAEITADLTEGKDPDPLAVAGLVGIIIPGGKIAAKVGKFRIGGKTVKYGLILGNKSVDLAIVGK : 1285  
257 SpAfp18X : SGEMQLVTSIIKGETIQETELHVHQAEYIGSWVDATVGAIIISFTPEGWELNTAQSAADIAADLTEGKDPDSLAVAGLVVGCIPGRIIAAKVGKFRIGGKVVKYGVMLGNKAVDLAIVGR : 1258  
258 SeAfp18 : SGEMQLVSSSINGETIQETELHVHQAEYIGSWVDATVGAITISFTPEGWVLTITSAADIAADLTEDKDPDPMVAVAGLVVGCIPGRIIAAKVGKFRIGGKVVKYGLMLGNKAVDLAIVGK : 1328  
259  
260 YrAfp18 : SIKTAVDTGPEPLAIYQAFASLGMSVKNSYDIANKMSSSEKISKKLEESARLRKLRKALQNTY-KYMSNPKMPV-RKFRVQOTDLGKIKHGEIKISRN-NGT-----TWEKGNOLHLLA : 1396  
261 SpAfpX18 : SIKTAVDAGEPLAIYQAFASLGMSVKNSYDMARNMSSRLKINRRMEESASLEELALQ-NDRPEYA-TS-VPVIRTRFVGLTEMLGRINNGDIEHF-NEN-TS-----TWEKGSKLHLLA : 1368  
262 SeAfp18 : SVKTAVDTGPEPLAIYKALLTSGIGTTNSYDMAKNMSSKLIKSKKLEDSVLDKPLQNLR-----GG--SKRPE--EGESTSQKRSQPDSESPENSQEAIVYSGPSSGRARVTHDQTEHHIML : 1439  
263  
264 YrAfp18 : YRLQNAAGGRLLPDPVFRDKIVIGEYVSKFRVKYNO-----KKNLEMRIAKMYTPTSNSTERIAKIQQNYKTGKEMSHAPQYDNDLSLGEKLDLEINS-NTDATTRGVLAGKINESTIN : 1510  
265 SpAfpX18 : YRLQNAAGGRRLAALFNKIVIGEGHTFKRVKYSO-----DKFNEMRIAKTYTPTSNSTERIAKIQDYRACKEMSHAPQYDNDLHYNLSDLEKLNLE-NKPDTDATTRGVLAGKINESTIAN : 1482  
266 SeAfp18 : NRFSLVLR---SFAEKRQSFSEHSSSKFKSSDEFKVDKSIPLDAQNASLNDMAKTDNLIINQLEQFTGDKKESISANLKN--IQIMIGDIMENRNNDNLNFHTYVIVGKNTTYDEI : 1554



```

267
268 YrAfp18 : INLYETAKGVDAWKTSANKATDVVLAPQNI FLKGRAGECLPESILMGWALQSQDPTKLAKKLMNTHSSSNIAANPLYKSLVELHSDGNASRFGE SVISDINMKMLSGAESKLFPTENSS : 1629
269 SpAfpX18 : INLYETAKAADDKWASANKATEVVLAPQNI FLKGRAGECLPESVLMGWALQSQDPAKLAKKFMSTYSSSNVADDP LYKSLVELHADGNASKFSAAI SDVKMNAI-GDAESR LFPKENAS : 1601
270 SeAfp18 : SNLYGFAEFKFSINNGN--LTLNLI GHYPVVINKYPERFRDYLIRNGVITQPELEFPYNIKNVARYLGSKAVSSEITGYYESIPATKVKIILSFTGANPITQKLGNTLQS--ISDLF SKKRFS : 1670
271
272 YrAfp18 : ---VRVDIPEHTMLISKVNKDGKIKYVFYDPNYGMAYFNKYKEMIS-FFKKKIKGYDTPKRSTS-FRQLDYSHLS DIKIKGKNLN---EIIDGEI PQIFRQEDVNLEGITPQDGIYRML : 1740
273 SpAfpX18 : ---VRVDIPEHTMLLSKVNQEGKVYVFYDPNYGLAYFDKYK-DLSAFFKKKLEAYDTPENSNLY-QLDYSHLPDVKIKGRNLN---EINGEIPALYKQERVNLOGISPHEGVYKMP : 1712
274 SeAfp18 : DEPNDALITQDELFTFRQTDLYTYDEM INHLKTIVRTTFTPVKPIEELIS-----SE-----KT-DAAIKGI MTINGDAEELISENLIIESK----- : 1745
275
276 YrAfp18 : GTHQQENNTYIKSON-NIYQVEWDQTTNFWRVFDSANTNRSRITVPIKRDIDGEWFKYTE TGLKGGGLFDEIKNNWLQRKRFKNLQDFNDIVDFEENKWSSEPI NKDIHMIWVGTRNISE : 1859
277 SpAfpX18 : G---DKN-YIK-VYNDNVYQVEWDQTMSTWRVFD PANTNRSRVTVPVKRDANGEWFRHLD TGLKGGGLFDEIKNNWLSCKKFKRLQDFTEVVELEANKWPEPEPVNKNIHMIWIGTKKISE : 1826
278 SeAfp18 : -----N-----SLDHD-----TSYFSHEVLSAVDRAYEKVNSVKS LFERAESQPEIKSQLKS----- : 1792
279
280
281 YrAfp18 : KNIGLSLETARKNSDYNTTIIYDSGIAGYESA KDFMTEKFKDSKVTLVDFRKKK-----YFHQLQEPSFPYEQAIRDKK-----YAQASDILRLLVLYK YEGGIYKDIDDV : 1961
282 SpAfpX18 : KNIGLSIETAQKNPDYNTTIIYDSGIPGESA KSEMAEKFNDSNVTLVDFRNKI-----YFHQLQEPAPSYEQAIRDKK-----YAQASDILRLLVLYK YEGGIYKDIDDV : 1928
283 SeAfp18 : ---LINEATG---LNDEVLIIDIKVDVSSISDMAYNRFKDNINTLHDYLSKQKSGGYTSFVLEKYRFNPSKEDAFAMPYDSKKRIFLAML PENQRHGGIVDTVTHEASHNSSYTLDH : 1904
284
285 YrAfp18 : QVKA FGSLATPKGIGVMREYAPEAGKTTAFNP TPIAATKNNPVVNKTLELAVENYH RGETNVLKLAGPDVFTESLYQEIPGMRPQVLGAQLDQFELAKRQALGMFLEKPKGFADEKLTLO : 2081
286 SpAfpX18 : QVKGFGSLATPKGIGVMREYAPEAGKATAFP NTPPIAATKNNSVNRALELAVENYRRGETNVLKLAGPDVFTEALYQEMPGRPQVLGQOLEQFELAKRQALGMFLEKPKSFADEQLTLO : 2048
287 SeAfp18 : TYICN-----ARNTGSEFSSFEPPTRDS-----RYFYENR-----VGLLSAKYALDLPENANITQNQLAQADILLRNSRLTKADTLLNAAEYN--AYMIDVLSR : 1993
288
289 YrAfp18 : EKAKI-RQPYEAIRGLSGYVDNGADHSWVTD-MPGNSTQSSGLS----- : 2123
290 SpAfpX18 : EKSRI SR-PYEAIRGLSGYVENGADHSWISDIPGTSALGNSQSEVSATFEP AIFKQALTEFVSQQAACQPGDPAITTYQS AFNSIPESQBITLQOVN DLKRALSASGNDLVAQAKYQYAL : 2167
291 SeAfp18 : VKINGSHIEFEENSRSKR SVSGCNHKLDDI LILASMNATLPREGGEFESSTFKKTLTEFINKGTTSQVDPVYASVYLP AFNTIVDSEGITLQOVKDLKSALPATGNDLRAQARYNYAV : 2113
292
293 SpAfpX18 : LAYLSGPRGIQLPIDKNEIR-----NRI VQETLEHADYVYGWKVKEREQFQAQINKA IERKNEISSRYSVTLRPKM : 2237
294 SeAfp18 : LQYLSGSAGIKLPIDTDVIRNSINDDLNIASCVDNCKKAASQRL ELLKAVPEYLSGPEAIIHAQIDTNLMINRIKNTLKHENYTYDLKVN ERD---YLLQLLEOKYIASSKPPKVGAQKW : 2229
295
296 SpAfpX18 : HANADRKVVNLRNEVTERNRLMNEWASKKNQDSLRLDMLNDSWHESYD----- : 2285
297 SeAfp18 : SADINKEINYLCEIEEKREVVQWENKKNESRRLDLWSTATKYLSDPKGIKPPIDTDVILNINVDL NHAGYVYNYKVKREKDNLEK KLSRTP LTSQIEVNRLQTEIAKRYRLIDYWGK : 2349
298
299 SeAfp18 : KADETLLMFILWRNVFG : 2366
300

```

Glycosyltransferase domain  
DXD

301 **Fig. S4** Amino acid alignment of *Y. ruckeri* (Yr) Afp18, *S. proteamaculans* (Sp) AGR96X AfpX18, and *S. entomophila* (Se) Afp18  
302 sequences. The conserved glycosyltransferase DxD, which is essential for sugar donor substrate binding, is indicated. Red  
303 (conserved) and yellow (shared) coloring indicates amino acid similarity between AfpX18 and the other two sequences, as outlined in  
304 Jank (1).

305

306 SpAfpX13 : MTDKTPQNOAENPVNTPPTLTDTTDARDGELKSRALPQADALKERFKAGSIPLQTDADFADLVDLANMGRQAVGCTEGQTGPANGFTLSLEGRLELKPNA : 100  
 307 SeAfp13 : MTDKTPKKTAEPTVNTQATLADTTDARDSEPKSRALPQADALKERFKAGSIPLQTDADFLIDLANMGRQAVGGAEGQTGPANGFTLSSEGLLELKPNA : 100  
 308 YrAfp13 : MKETHRLIIGNEKQ-----MLTGLAVVCG-----PETNSLKERFKERKAGSIPLQTDFEKLIADIADVGRRAAGLAFGQTGPNGHQLDSEVERLSVKVDSN : 86  
 309  
 310 SpAfpX13 : KGIIVDKDGIIVKVEASKGLQVTSAGVSVQAGNGISVAGTGVAVKVEAS-----KGLQVTSAGVSVQAGNGISVASTGVAVKAGNGISVAGTGVAV : 191  
 311 SeAfp13 : KGIIVDKDGIIVKVEASKGLQVTSAGVSVQAGNGVAVNGSGVNVKLANGTASVTTGNAGGLTLAAAGLSVQAGSGISVANTGVAVQAGNGISVTSVAGTGVAV : 200  
 312 YrAfp13 : S-----GLSVTSSGVKVIIPKN--S-C-----G-----VVVDSGTISVKPKRCMEVTSDDGVRI : 130  
 313  
 314 SpAfpX13 : KVEASKGLQVTSAGVSVQAGDGISVAG-----TGVAVKAGSGISVAGTGVAVKVEASKGLQVTSAGVSVQAGNGISVAG : 265  
 315 SeAfp13 : KAEASKGLQVTSAGVSVQAGNGVAVNGSGVNVKLANGTASVTTGNAGGLNLAAGLSVQAGSGISVTSVAGVAVKVEASKGLQVTSAGVSVQAGNGVAVNG : 300  
 316 YrAfp13 : TNEFAFQKGMILMFAGTAAEMPPGWALCD-----GS-----NCRPN-- : 166  
 317  
 318 SpAfpX13 : TGVAVKAGSGISVAGTGVAVKVEASKGLQVTSAGVSVQAGDGISVAGTGVAVKVEAS-----KGLQVTS : 345  
 319 SeAfp13 : SGVNVKLANGTASVTTGNAGGLNLAAGLSVQAGSGISVTSVAGVAVKVEASKGLQVTSAGVSVQAGNGVAVNGSGVNVKLANGTASVTTGNAGGLNLA : 400  
 320 YrAfp13 : -----LIDR-----FILGSTFTHSKYSNTAQLAGSGN-----TKTYNK----- : 199  
 321  
 322 SpAfpX13 : GVSVOAGNGISVAGTGVAVKVEASKGLQVTSAGVSVQAGNGISVAGTGVAVKAGSGISVAGTGVAV-----VKAGNGISVAGTGVAVKVEASKGL : 434  
 323 SeAfp13 : GLSVQAGSGISVTSVAGVAVKVEASKGLQVTSAGVSVQAGNGVAVNGSGVNVKLANGTASVTTGNAGGLTLAAAGLSVQAGSGISVANT : 488  
 324 YrAfp13 : -----QSTSFIVTGTVNIETIITLIGQIPRHHNDG----- : 230  
 325  
 326 SpAfpX13 : QVTASGVSVQAGDGISVAGTGVAVKVEASKGLQVTSAGVSVGLNNTAWIKMCGLHNATFYVSDTYVCFVFFCNHSTCCTAYVYGRGCYYLSMYKGDVKLNSV : 534  
 327 SeAfp13 : -----GVAVQAGNGISVTSVAGVAVKAGN--GIQVNTINGVGLKSTAWINVMCGLHNATFYVYSSYFCAFFCNYSNGCVAYVYGRCAFYLSYTVSGDIKLSV : 581  
 328 YrAfp13 : -----VRY-----TYKAGNYDIMNINCYGSVSVGTG-----SSSNKFALENFSD-----SESVHLTQSSTV : 282  
 329  
 330  
 331 SpAfpX13 : DHNEIISMVCGSGSIAAATMVSWKSTKAAAGISFKYLGGKLLITSTSHSGSVTLVAAP : 590  
 332 SeAfp13 : SPNQILLAMTC-GSSSAVTMMSWTSTKAAAGISLEYQKSLINSSISGASLVSA : 636  
 333 YrAfp13 : GD-----GGGHKHTATMSTINGHQHSTDVIPPYVTLAFLIKL----- : 318  
 334  
 335  
 336  
 337  
 338  
 339  
 340

**Fig. S5** Amino acid alignment of *S. entomophila* (Se) Afp13, *S. proteamaculans* (Sp) AGR96X AfpX13, and *Y. ruckeri* (Yr) Afp13. Similar amino acid residues are black-shaded. Conserved tryptophan (Q) and cysteine residues (C) are indicated. Refer to Supplemental Fig. S6 for an alignment of the tail fiber amino acid repeats.

# AfpX13

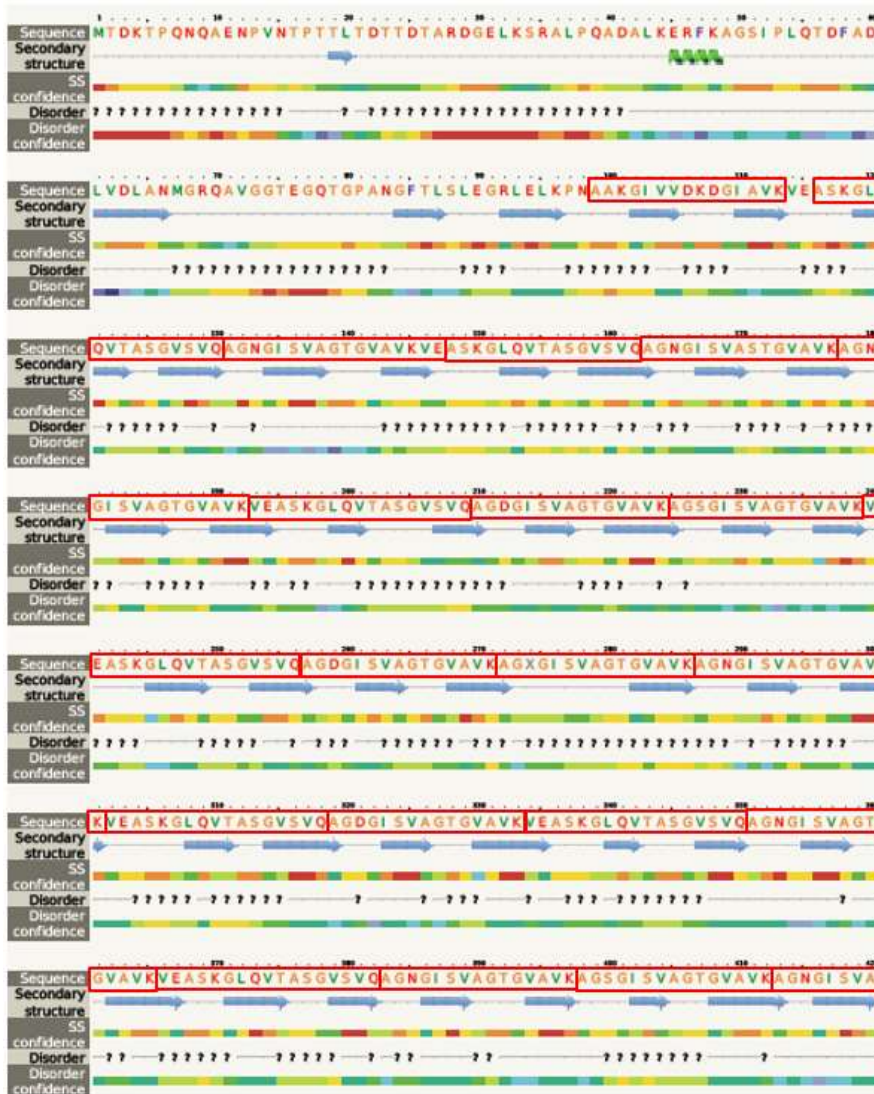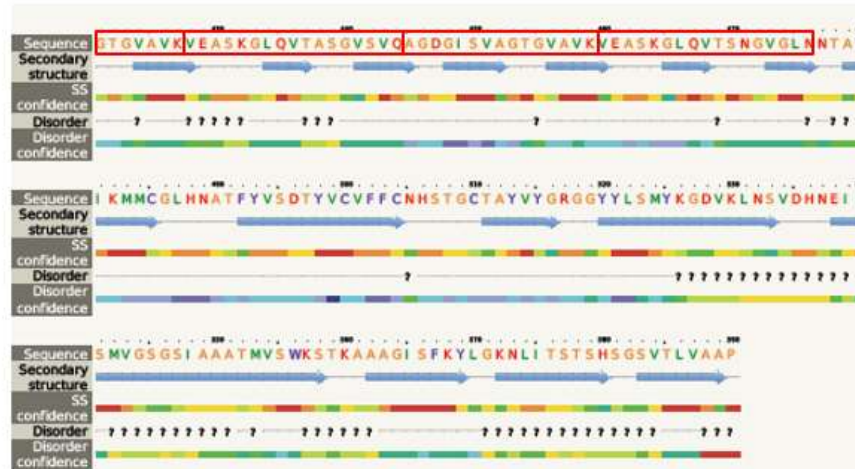

**Confidence Key**

High(9) Low (0)

? Disordered ( 64%)

Alpha helix ( 1%)

Beta strand ( 54%)



## Afp13

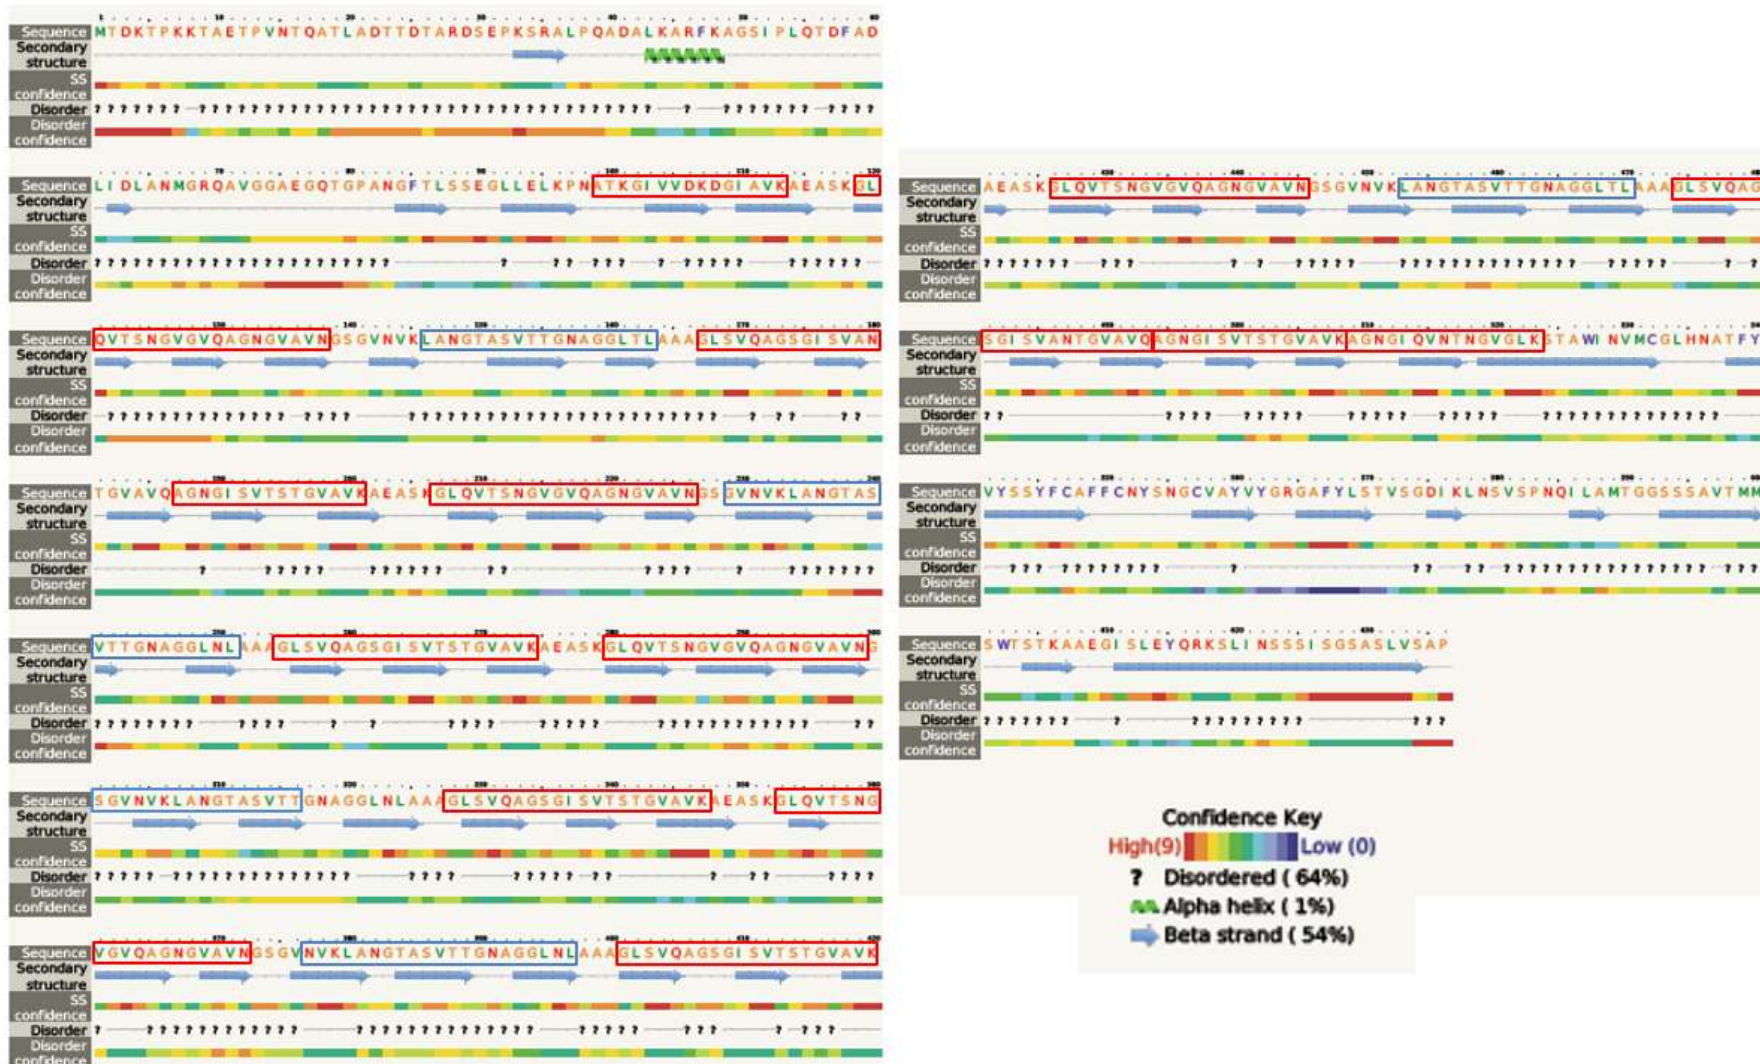

342

343 **Fig. S6** Secondary structure and disorder prediction derived from the Phyre<sup>2</sup> server (2). Red boxes denotes amino acid repeats present in *S.*344 *proteamaculans* AfpX13 and *S. entomophila* Afp13. Blue boxes indicate the less-conserved *S. entomophila* Afp13 amino acid repeat.

## AfpX13

MTDKTPQNQAENPVNTPTTLTDDTTARDGELKSRALPQADALKERFKA  
 GSIPLQTD FADLVDLANMGRQAVGGTEGQTGPANGFTLSLEGRLELKP

AAKGI VVDKDGIAVK  
 VEASKGLQVTASGVSQ  
 AGNGISVAGTGVAVK  
 VEASKGLQVTASGVSQ  
 AGNGISVASTGVAVK  
 AGNGISVAGTGVAVK  
 VEASKGLQVTASGVSQ  
 AGDGISVAGTGVAVK  
 AGSGISVAGTGVAVK  
 VEASKGLQVTASGVSQ  
 AGNGISVAGTGVAVK  
 AGSGISVAGTGVAVK  
 AGNGISVAGTGVAVK  
 VEASKGLQVTASGVSQ  
 AGDGISVAGTGVAVK  
 VEASKGLQVTASGVSQ  
 AGNGISVAGTGVAVK  
 VEASKGLQVTASGVSQ  
 AGNGISVAGTGVAVK  
 AGSGISVAGTGVAVK  
 AGNGISVAGTGVAVK  
 VEASKGLQVTASGVSQ  
 AGDGISVAGTGVAVK  
 VEASKGLQVTSNGVGLNNTAWIKMMCGLHNATFYVSDTYVVCVFFC

NHSTGCTAYVYGRGGYYLSMYKGDVKNLNSVDHNEIISMVSGSIAAATM  
 VSWKSTKAAAGISFKYLGNLITSTSHSGSVTLVAAP

} Baseplate  
binding

} Shaft

} Knob

## Afp13

MTDKTPKKAETPVNTQATLADTTDTARDSEPKSRALPQADALKARFKA  
 GSIPLQTD FADLIDLANMGRQAVGGAEGQTGPANGFTLSSEGLLELKP

ATKGI VVDKDGIAVKAASK  
 GLOVTSNGVGV QAGNGVAVNNGSGVNVKLANGTASVTTGNAGGLTLAAA  
 GLSVQ AGSGISVANTGVAVQ  
 AGNGISVTSTGVAVKAASK  
 GLOVTSNGVGV QAGNGVAVNNGSGVNVKLANGTASVTTGNAGGLNLAAA  
 GLSVQ AGSGISVTSTGVAVK  
 GLOVTSNGVGV QAGNGVAVNNGSGVNVKLANGTASVTTGNAGGLNLAAA  
 GLSVQ AGSGISVTSTGVAVKAASK  
 GLOVTSNGVGV QAGNGVAVNNGSGVNVKLANGTASVTTGNAGGLNLAAA  
 GLSVQ AGSGISVTSTGVAVKAASK  
 GLOVTSNGVGV QAGNGVAVNNGSGVNVKLANGTASVTTGNAGGLTLAAA  
 GLSVQ AGSGISVANTGVAVQ  
 AGNGISVTSTGVAVK  
 AGNGIQVNTNGVGLKSTAWINVMCGLHNATFYVYSSYFCAFFC

NYSNGCVAYVYGRGAFYLSVSGDIKLSVSPNQILAMTGGSSSAVTMM  
 SWTSTKAAEGISLEYQRKSLINSSSISGSASLVSA

} Baseplate  
binding

} Shaft

} Knob

345

346 **Fig. S7** Amino acid alignment of the predicted *S. proteamaculans* AfpX13 (24 repeats) and *S.*  
 347 *entomophila* Afp13 (14 repeats) tail fiber shaft repeats. Putative Afp baseplate, shaft, and knob  
 348 regions are indicated. A repeat consisting of a tryptophan residue (**W**) followed by a series of four  
 349 cysteine residues (**C**) was located within five residues of the C-terminus. Predicted baseplate  
 350 binding, shaft, and knob regions are indicated.

351

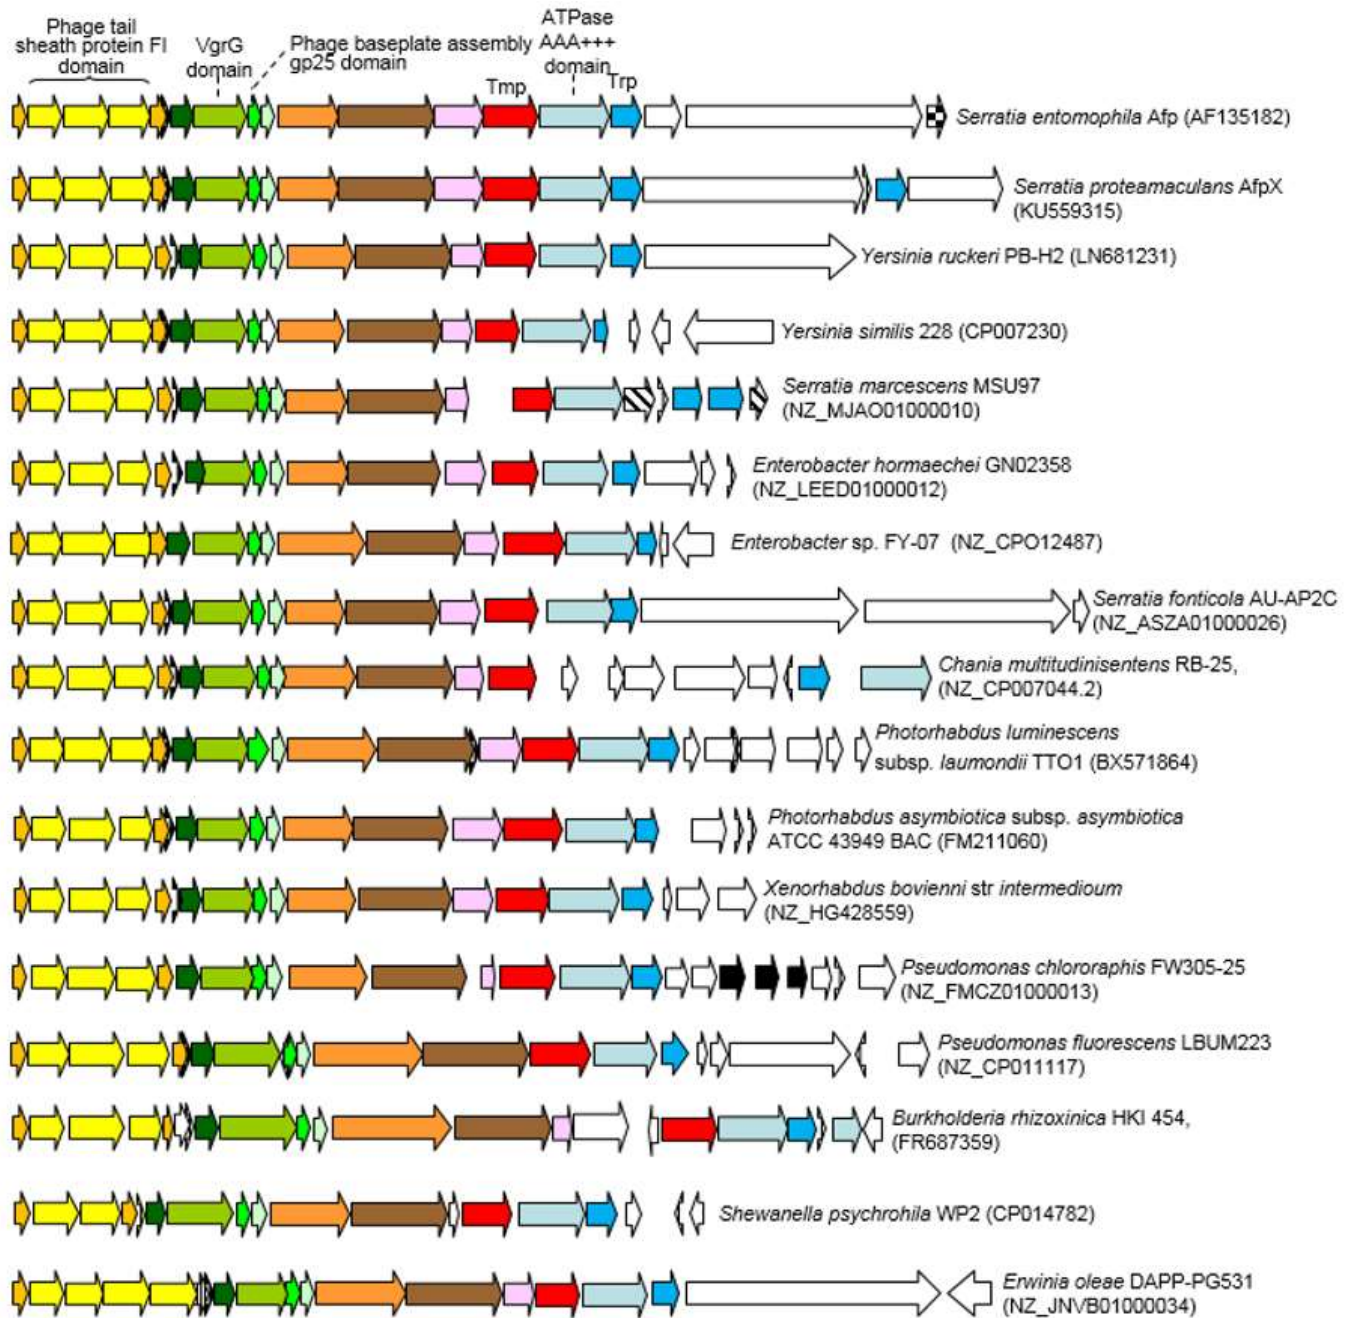

352

353 **Fig. S8** Afp variants found in the draft genome sequences of various bacterial species sourced  
 354 from the NCBI nrBlast database. ORFs are denoted by arrows. Amino acid regions with high  
 355 similarity are indicated by similar coloring. Predicted and ascribed protein domains are listed  
 356 above the *S. entomophila* *afp* gene cluster. Forward diagonal lines within the ORFs of *Serratia*  
 357 *marcescens* MSU97 denote orthologs of the type three secretion system effector proteins  
 358 WP\_073532279 and WP\_073532282. Refer to Supplemental Fig. S9 for sequences used and  
 359 associated references.

360

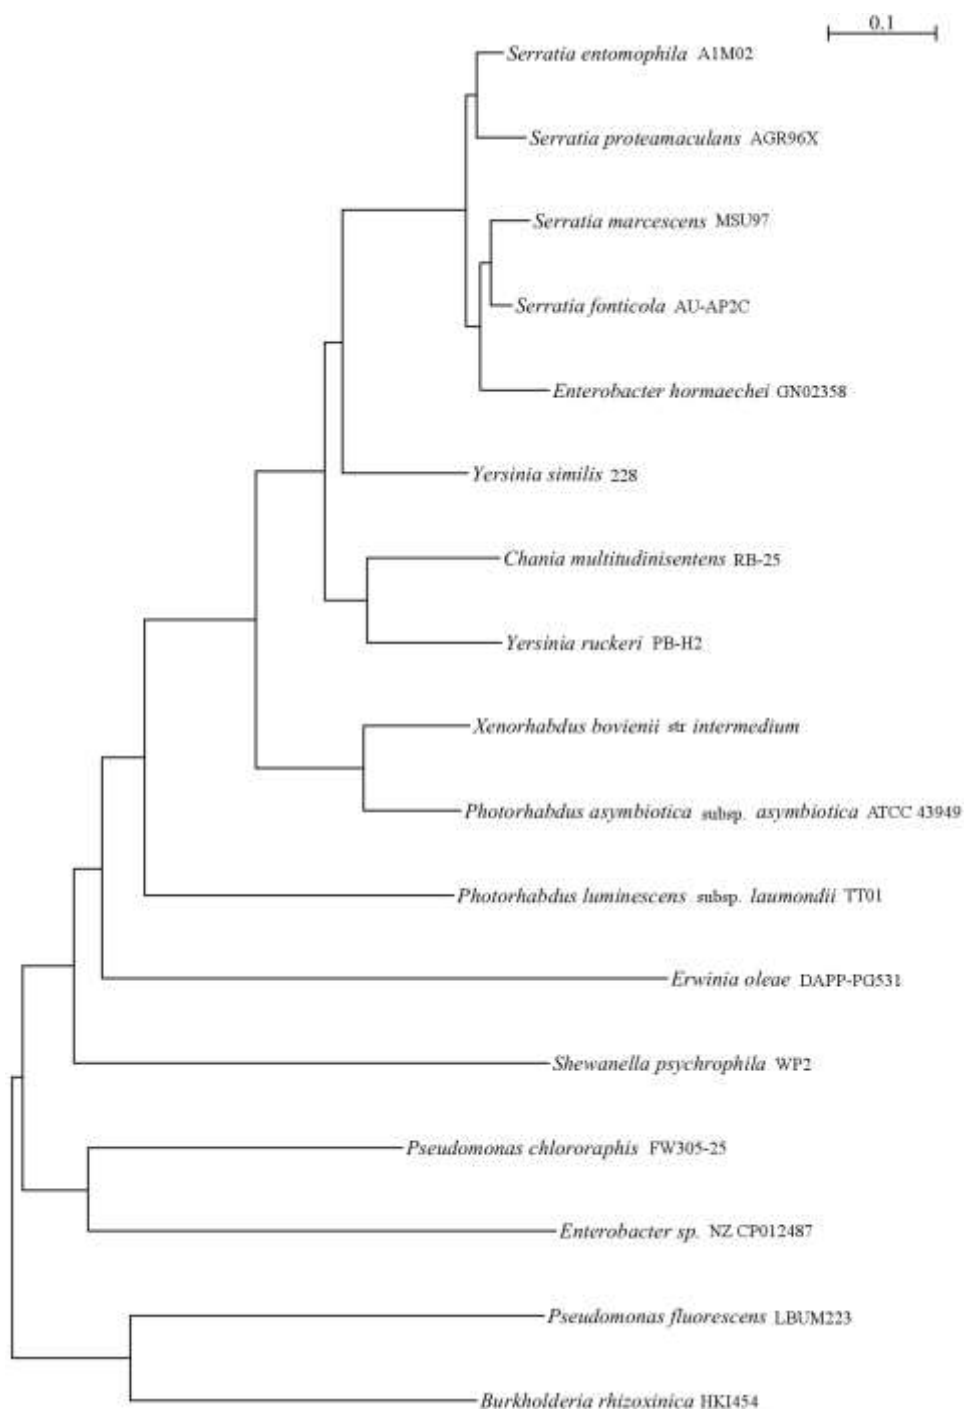

361

362 **Fig. S9** Phylogenetic assessment of AfpX15 of selected Afp variants found in the draft genome  
 363 sequences of other bacterial species sourced from the NCBI nrBlast database. Sequences  
 364 included: *Serratia entomophila* Afp (AF135182) (3); *Serratia proteamaculans* AfpX  
 365 (KU559315); *Yersinia ruckeri* PB-H2 (LN681231) (4); *Yersinia similis* 228 (CP007230) (5);  
 366 *Serratia marcescens* MSU97 contig00010 (NZ\_MJAO01000010) (6); *Enterobacter*  
 367 *hormaechei* GN02358 (NZ\_LEED01000012) (7); *Enterobacter* sp. FY-07 (NZ\_CPO12487) (8);  
 368 *Serratia fonticola* AU-AP2C contig26 (NZ\_ASZA01000026) (9); *Chania multitudinisentens* RB-

369 25, (NZ\_CP007044.2) (10); *Photorhabdus luminescens* subsp. *laumondii* TTO1 (BX571864)  
370 (11); *Photorhabdus asymbiotica* subsp. *asymbiotica* ATCC 43949, BAC clone 20-21  
371 (FM211060) (12); *Xenorhabdus bovienii* str. Intermedium (NZ\_HG428559) (13); *Pseudomonas*  
372 *chlororaphis* FW305-25 (NZ\_FMCZ01000013) (14); *Pseudomonas fluorescens* LBUM223  
373 (NZ\_CP011117) (15); *Burkholderia rhizoxinica* HKI 454, (FR687359) (16); *Shewanella*  
374 *psychrophila* strain WP2 (CP014782) (17); *Erwinia oleae* strain DAPP-PG531  
375 (NZ\_JNVB01000034) (18).

376

377

378



## 379 REFERENCES

- 380 1. Jank T; Eckerle S, Steinemann M, Trillhaase C, Schimpl M, Wiese S, van Aalten DM,  
381 Driever W, Aktories K. 2015. Tyrosine glycosylation of Rho by *Yersinia* toxin impairs  
382 blastomere cell behaviour in zebrafish embryos. Nat Commun 6:7807.
- 383 2. Kelley LA, Sternberg MJE. 2009. Protein structure prediction on the web: a case study  
384 using the Phyre serve. Nat Prot 4:363-371.
- 385 3. Hurst MR, Glare TR, Jackson TA. 2004. Cloning *Serratia entomophila* antifeeding  
386 genes--a putative defective prophage active against the grass grub *Costelytra*  
387 *zealandica*. J Bacteriol 186:5116-5128.
- 388 4. Nelson MC, LaPatra SE, Welch TJ, Graf J. 2015. Complete genome sequence of  
389 *Yersinia ruckeri* strain CSF007-82, etiologic agent of red mouth disease in salmonid fish.  
390 Genome Announc 3 (1): e01491-14.
- 391 5. Sprague LD. and Neubauer H. 2014. Genome sequence of *Yersinia similis* Y228T, a  
392 member of the *Yersinia pseudotuberculosis* complex, Genome Announc 2 (2): e00216-  
393 14. (CP007230).
- 394 6. Matilla MA, Udaondo Z, Krell T, Salmond GP. 2017. Genome sequence of *Serratia*  
395 *marcescens* MSU97, a plant-associated bacterium that makes multiple antibiotics.  
396 Genome Announc 5 (9): e01752-16.
- 397 7. Adams M, Sutton G, Nelson K, Bonomo R, Mc Corrison J, Sanka R, Brinkac L, Nierman  
398 W. 2015. *Enterobacter hormaechei* GN02358 Deposited (01-JUN-2015) JCVI, 4120  
399 Capricorn lane, La Jolla, CA 92037, USA (NZ\_LEED01000012).
- 400 8. Ji K, Wang W, Zeng B, Chen S, Zhao Q, Chen Y, Li G, Ma T. 2016. Bacterial cellulose  
401 synthesis mechanism of facultative anaerobe *Enterobacter* sp. FY-07. Sci Rep 6: 21863.
- 402 9. Devi U, Khatri I, Kumar N, Sharma D, Subramanian, S, Saini AK. 2013. Draft genome  
403 sequence of plant-growth-promoting rhizobacterium *Serratia fonticola* strain AU-AP2C,  
404 isolated from the pea rhizosphere. Genome Announc 1 (6): e01022-13.

- 405 10. Robson EHJ. 2014. Unpublished, complete genome. *Chania multitudinisentens* RB-25,  
406 deposited (09-JAN-2014) Genetics and molecular biology, University of Malaya, Kuala  
407 Lumpur 50603, Malaysia (NZ\_CP007044.2).
- 408 11. Duchaud E, Rusniok C, Frangeul L, Buchrieser C, Givaudan A, Taourit S, Bocs S,  
409 Boursaux-Eude C, Chandler M, Charles JF, Dassa E, Derose R, Derzelle S, Freyssinet  
410 G, Gaudriault S, Medigue C, Lanois A, Powell K, Siguier P, Vincent R, Wingate V,  
411 Zouine M, Glaser P, Boemare N, Danchin A, Kunst F. 2003. The genome sequence of  
412 the entomopathogenic bacterium *Photorhabdus luminescens*. Nat Biotechnol 21:1307-  
413 1313.
- 414 12. Waterfield NR, Sanchez-Contreras M, Eleftherianos I, Dowling A, Yang G, Wilkinson P,  
415 Parkhill J, Thomson N, Reynolds SE, Bode HB, Dorus S, French-Constant RH. 2009.  
416 Rapid Virulence Annotation (RVA): identification of virulence factors using a bacterial  
417 genome library and multiple invertebrate hosts. Proc Natl Acad Sci USA 105:15967-  
418 15972.
- 419 13. Murfin K, Klassen J, Lee M, Forst S, Stock P, Goodrich-Blair H. 2013. Unpublished,  
420 Deposited (12-SEP-2013) Bacteriology Department, University of Wisconsin-Madison,  
421 Madison, WI 53706, United States. (*Xenorhabdus bovienni* str *intermedioum*  
422 (NZ\_HG428559))
- 423 14. Crable, B, unpublished, *Pseudomonas chlororaphis* FW305-25, whole genome shotgun  
424 sequence deposited (11-AUG-2016) Oak ridge national laboratory, one bethel valley  
425 road, Oak Ridge, TN 37831, USA. (NZ\_FMCZ01000013).
- 426 15. Roquigny R, Arseneault T, Gadkar VJ, Novinscak A, Joly DL, Filion M. 2015. Complete  
427 genome sequence of biocontrol strain *Pseudomonas fluorescens* LBUM223. Genome  
428 Announc 3(3): e00443-15.
- 429 16. Lackner G, Moebius N, Partida-Martinez L, Hertweck C. 2011. Complete genome  
430 sequence of *Burkholderia rhizoxinica*, an endosymbiont of *Rhizopus microspores*. J  
431 Bacteriol 193:783-784.

- 432 17. Xu G, Jian H, Xiao X, Wang F. 2017. Complete genome sequence of *Shewanella*  
433 *psychrophila* WP2, a deep-sea bacterium isolated from west Pacific sediment. *Marine*  
434 *Genomics* 35:19-21.
- 435 18. Moretti C, Cortese C, da Silva DP, Venturi V, Firrao G, Buonauro R. 2014. Draft genome  
436 sequence of *Erwinia oleae*, a bacterium associated with olive knots caused by  
437 *Pseudomonas savastanoi* pv. *savastanoi*. *Genome Announc* 2(6): e01308-14.
- 438
